# Supplementary material
Source: PubMed Central journal article supplement (PMC7490720)
Supplement: mmc1.pdf [file mmc1.pdf]

# **SUPPLEMENTARY DATA**

## **Angiotensin-converting enzyme inhibitors and angiotensin-receptor blockers and the risk of COVID-19 infection or severe disease: Systematic Review and meta-analysis of observational studies**

Daniel Caldeira MD PhD, Mariana Alves MD, Ryan Gouveia e Melo MD, Pedro Silvério António MD, Néilson Cunha MD, Afonso Nunes-Ferreira MD, Luisa Prada MD, João Costa MD PhD, Fausto J Pinto MD PhD

## Content

|                                                                                                                                                                                   |    |
|-----------------------------------------------------------------------------------------------------------------------------------------------------------------------------------|----|
| Supplementary Table 1 – Search Strategy .....                                                                                                                                     | 3  |
| Supplementary Table 2: Key studies excluded at full-text appraisal stage, with reasons. ....                                                                                      | 4  |
| Supplementary Table 3 – Risk of bias for each study, <i>per</i> outcome. ....                                                                                                     | 5  |
| Supplementary Table 4 – References of unpublished studies included. ....                                                                                                          | 6  |
| Supplementary Figure 1 – Overview of risk of bias classification .....                                                                                                            | 7  |
| Supplementary Figure 2: Forest plots of ACEi association with the risk of COVID-19 infection and disease severity. ....                                                           | 8  |
| Supplementary Figure 3: Forest plots of ARB association with the risk of COVID-19 infection and disease severity. ....                                                            | 9  |
| Supplementary Figure 4: Funnel plots for grouped ACEi/ARB evaluations and respective outcomes. ....                                                                               | 10 |
| Supplementary Figure 5: Forest plots of ACEi/ARB association in studies with adjusted estimates with the risk of COVID-19 infection and disease severity. ....                    | 11 |
| Supplementary Figure 6: Forest plots of ACEi/ARB association with the risk of COVID-19 infection and disease severity, in studies including only patients with hypertension. .... | 12 |
| Supplementary Figure 7: Forest plots of ACEi/ARB association with the risk of COVID-19 infection and disease severity, including unpublished data from medRxiv. ....              | 13 |

## Supplementary Table 1 – Search Strategy

| # | Searches using OVID                                                                                                                                                                                                                                                                                                                                                                                                                                                                                       |
|---|-----------------------------------------------------------------------------------------------------------------------------------------------------------------------------------------------------------------------------------------------------------------------------------------------------------------------------------------------------------------------------------------------------------------------------------------------------------------------------------------------------------|
| 1 | exp angiotensin-converting enzyme inhibitors/                                                                                                                                                                                                                                                                                                                                                                                                                                                             |
| 2 | (angiotensin-converting enzyme inhibitor or ACE-inhibitor* or acei or ace inhibitor or alacepril or benazepril or benazeprilat or captopril or ceranapril or cilazapril or cilazaprilat or delapril or enalapril or enalaprilat or fosinopril or fosinoprilic acid or imidapril or libenzapril or lisinopril or moexipril or omapatrilat or perindopril or perindoprilat or quinapril or quinaprilat or ramipril or ramiprilat or rentiapril or spirapril or temocapril ortrandolapril or zofenopril).af. |
| 3 | exp Angiotensin Receptor Antagonists/                                                                                                                                                                                                                                                                                                                                                                                                                                                                     |
| 4 | (ARB* or angiotensin?receptor?blocker or (angiotensin adj2 receptor adj2 (antagonist or blocker)) or candesartan or eprosartan or enoltasosartan or irbesartan or Losartan or olmesartan or sapisartan or tasosartan or telmisartan or valsartan).af.                                                                                                                                                                                                                                                     |
| 5 | 1 or 2 or 3 or 4                                                                                                                                                                                                                                                                                                                                                                                                                                                                                          |
| 6 | ("2019 nCoV" or 2019nCoV or "2019 novel coronavirus" or "COVID 19" or COVID19 or "new coronavirus" or "novel coronavirus" or "SARS CoV-2" or (Wuhan and coronavirus) or "COVID 19" or "SARS-CoV" or "2019-nCoV" or "SARS-CoV-2 SARS-CoV2").af.                                                                                                                                                                                                                                                            |
| 7 | 5 and 6                                                                                                                                                                                                                                                                                                                                                                                                                                                                                                   |
| 8 | remove duplicates from 7                                                                                                                                                                                                                                                                                                                                                                                                                                                                                  |

Supplementary Table 2: Key studies excluded at full-text appraisal stage, with reasons.

| Study                                           | Reason for exclusion                                                                                                                                 |
|-------------------------------------------------|------------------------------------------------------------------------------------------------------------------------------------------------------|
| Murray 2020 Cardiovasc Res                      | Wrong publication type: Background/narrative review article                                                                                          |
| Piva 2020 J Crit Care                           | Wrong outcome: no data between exposure and outcomes of interest                                                                                     |
| Rothlin 2020 Drug Devel Res                     | Wrong publication type: Background/narrative review article                                                                                          |
| Sommerstein 2020 J Am Heart Assoc               | Wrong publication type: Background/narrative review article                                                                                          |
| Morfeld 2020 Gesundheitswesen                   | Wrong outcome: no data between exposure and outcomes of interest                                                                                     |
| Rico-Mesa 2020 Curr Cardiol Rep                 | Wrong publication type: Background/narrative review article                                                                                          |
| Slawinski 2020 Kardiol Pol                      | Wrong publication type: review article                                                                                                               |
| Speth 2020 J Travel Med                         | Wrong publication type: Background article/comment                                                                                                   |
| Sriram K 2020 Clin Pharmacol Ther               | Wrong publication type: review of basic science studies about ACE                                                                                    |
| Liu Y 2020 Sci China Life Sci.                  | Wrong intervention: No data about ACEi/ARB exposure                                                                                                  |
| Ciulla 2020 Eur Heart J                         | Wrong outcome: not enough data to establish the risk of exposure and outcomes of interest                                                            |
| Aronson 2020 BMJ                                | Wrong publication type: Editorial                                                                                                                    |
| Cure 2020 Diabetes Metab Syndr.                 | Wrong publication type: review of pathophysiology                                                                                                    |
| Guo 2020 Zhonghua nei ke za zhi                 | Wrong control: case series of 4 patients treated with aliskiren for blood pressure control during hospitalization for severe COVID-19; no comparator |
| Zangrillo 2020 Crit Care                        | Wrong intervention: Angiotensin II (agonist) as treatment; also no comparator                                                                        |
| Vaduganathan 2020 NEJM                          | Wrong publication type: review                                                                                                                       |
| Lopes 2020 Am Heart J                           | Wrong publication type: Study rationale/protocol                                                                                                     |
| Sama 2020 Eur Heart J                           | Wrong population: patients without SARS-CoV-2 infection / COVID-19                                                                                   |
| Di Castelnuovo 2020 Hypertension                | Wrong publication type: Study rationale                                                                                                              |
| Furuashi 2020 Hypertens Res                     | Wrong publication type: Editorial                                                                                                                    |
| Snyder 2020 Pharmacogenomics                    | Wrong publication type: Background/narrative review article                                                                                          |
| Canata 2020 Eur Heart J Cardiovasc Pharmacother | Wrong intervention – continuation vs. discontinuation ACEi/ARB                                                                                       |
| Turgeon 2020 Can J Cardiol                      | Wrong publication type: Editorial                                                                                                                    |
| Sunden-Cullberg 2020 Hypertens                  | Wrong population: non-COVID                                                                                                                          |
| De Vries 2020 Neth Heart J                      | Wrong publication type: review                                                                                                                       |
| Bobkova 2020 Med Hypotheses                     | Wrong publication type: review                                                                                                                       |
| Chen 2020 J Med Virol                           | Wrong intervention: Arbidol (hemagglutinin)                                                                                                          |
| Mehra 2020 New Eng J Med                        | Retracted paper                                                                                                                                      |
| NCT04353596                                     | Ongoing trial - ARB/ACEi                                                                                                                             |
| NCT04311177                                     | Ongoing trial - ARB                                                                                                                                  |
| NCT04318418                                     | Ongoing case-control study; same as Di Castelnuovo [Hypertension]                                                                                    |
| NCT04312009                                     | Ongoing trial - ARB                                                                                                                                  |

Supplementary Table 3 – Risk of bias for each study, *per* outcome.

| STUDY (FIRST AUTHOR SURNAME) / OUTCOME | RISK OF INFECTION | RISK OF MORTALITY | RISK OF SEVERE DISEASE |
|----------------------------------------|-------------------|-------------------|------------------------|
| AMAT-SANTOS                            | Moderate*         | Serious*          | -                      |
| ARGENZIANO                             | -                 | -                 | Serious                |
| BEAN                                   | -                 | Serious           | Serious                |
| CHODICK                                | Moderate          | -                 | -                      |
| CHEN                                   | -                 | Serious           | -                      |
| DE ABAJO                               | Moderate          | -                 | Moderate               |
| FELICE                                 | -                 | Serious           | Serious                |
| FENG                                   | -                 | -                 | Serious                |
| GAO                                    | -                 | Moderate          | Serious                |
| GNAVI                                  | Serious           | -                 | -                      |
| HU                                     | -                 | Serious           | Serious                |
| HUANG                                  | -                 | Serious           | Serious                |
| IMAM                                   | -                 | -                 | -                      |
| JUNG                                   | -                 | Moderate          | Moderate               |
| LI                                     | -                 | Serious           | Serious                |
| MANCIA                                 | Moderate          | Moderate          | -                      |
| MEHRA                                  | -                 | Serious           | -                      |
| MEHTA                                  | Moderate          | -                 | Moderate               |
| MENG                                   | -                 | Serious           | Serious                |
| MILLION                                | -                 | Serious           | -                      |
| MONTASTRUC                             | -                 | Critical          | -                      |
| PENG                                   | -                 | Serious           | Serious                |
| REYNOLDS                               | Moderate          | -                 | Moderate               |
| TAN                                    | -                 | Serious           | Serious                |
| TEDESCHI                               | -                 | Serious           | -                      |
| YANG                                   | -                 | Serious           | Serious                |
| ZHANG                                  | -                 | Serious           | Serious                |
| ZHOU                                   | -                 | Serious           | Serious                |
| <b>UNPUBLISHED</b>                     |                   |                   |                        |
| IP**                                   | -                 | Critical          | -                      |
| KHERA**                                | -                 | Critical          | -                      |
| LIU**                                  | -                 | -                 | Critical               |
| RENTSCH**                              | Critical          | -                 | Critical               |
| ROSSI**                                | -                 | Critical          | -                      |
| YAN**                                  | Critical          | -                 | Critical               |
| ZENG**                                 | -                 | Critical          | -                      |

\* Using the Cochrane Risk of Bias Tool; The remaining studies were evaluated with ROBINS-I.

\*\*Unpublished studies were classified by the reviewers as having critical risk of bias due to this status.

## Supplementary Table 4 – References of unpublished studies included.

| References of unpublished studies                                                                                                                                                                                                                             |
|---------------------------------------------------------------------------------------------------------------------------------------------------------------------------------------------------------------------------------------------------------------|
| Rossi PG, Marino M, Formisano D, Venturelli F, Vicentini M, Grilli R, et al. Characteristics and outcomes of a cohort of SARS-CoV-2 patients in the Province of Reggio Emilia, Italy. medRxiv 2020                                                            |
| Ip A, Parikh K, Parrillo JE, Mathura S, Hansen E, Sawczuk IS, et al. Hypertension and Renin-Angiotensin-Aldosterone System Inhibitors in Patients with Covid-19. medRxiv 2020                                                                                 |
| Liu Y, Huang F, Xu J, Yang P, Qin Y, Cao M, et al. Anti-hypertensive Angiotensin II receptor blockers associated to mitigation of disease severity in elderly COVID-19 patients. medRxiv 2020                                                                 |
| Rentsch CT, Kidwai-Khan F, Tate JP, Park LS, King JT, Skanderson M, et al. Covid-19 Testing, Hospital Admission, and Intensive Care Among 2,026,227 United States Veterans Aged 54-75 Years. medRxiv 2020                                                     |
| Yan H, Valdes AM, Vijay A, Wang S, Liang L, Yang S, et al. Role of Drugs Affecting the Renin-Angiotensin-Aldosterone System on Susceptibility and Severity of COVID-19: A Large Case-Control Study from Zhejiang Province, China. medRxiv 2020                |
| Zeng Z, Sha T, Zhang Y, Wu F, Hu H, Li H, et al. Hypertension in patients hospitalized with COVID-19 in Wuhan, China: A single-center retrospective observational study. medRxiv 2020                                                                         |
| Khera R, Clark C, Lu Y, Guo Y, Ren S, Truax B, et al. Association of Angiotensin-Converting Enzyme Inhibitors and Angiotensin Receptor Blockers with the Risk of Hospitalization and Death in Hypertensive Patients with Coronavirus Disease-19. medRxiv 2020 |

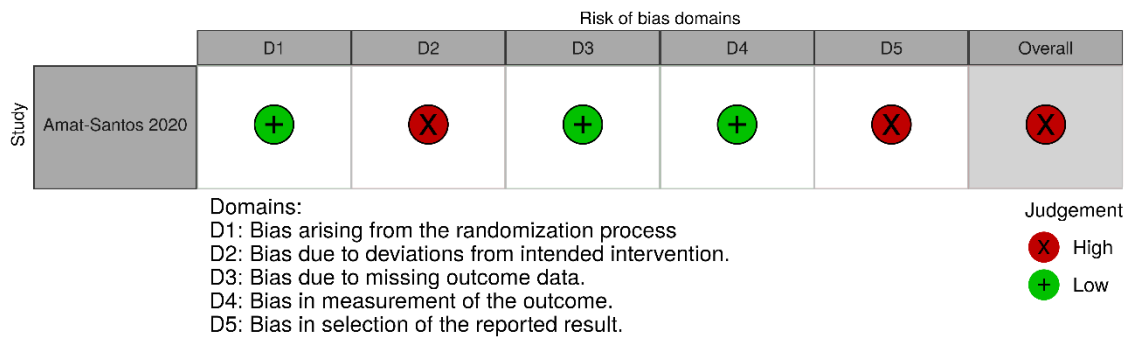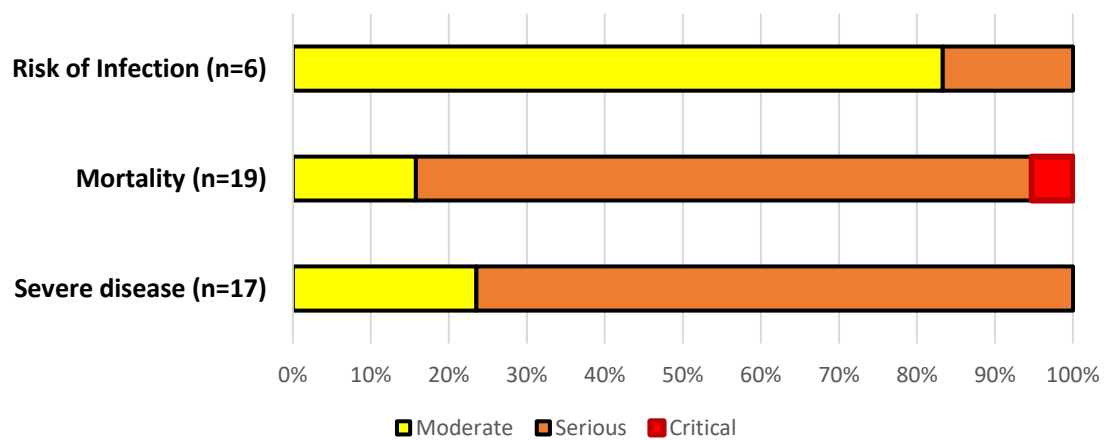

Supplementary Figure 1 – Overview of risk of bias classification; Upper figure for randomized controlled trial with risk of bias tool; and lower figure for observational studies with ROBINS-I

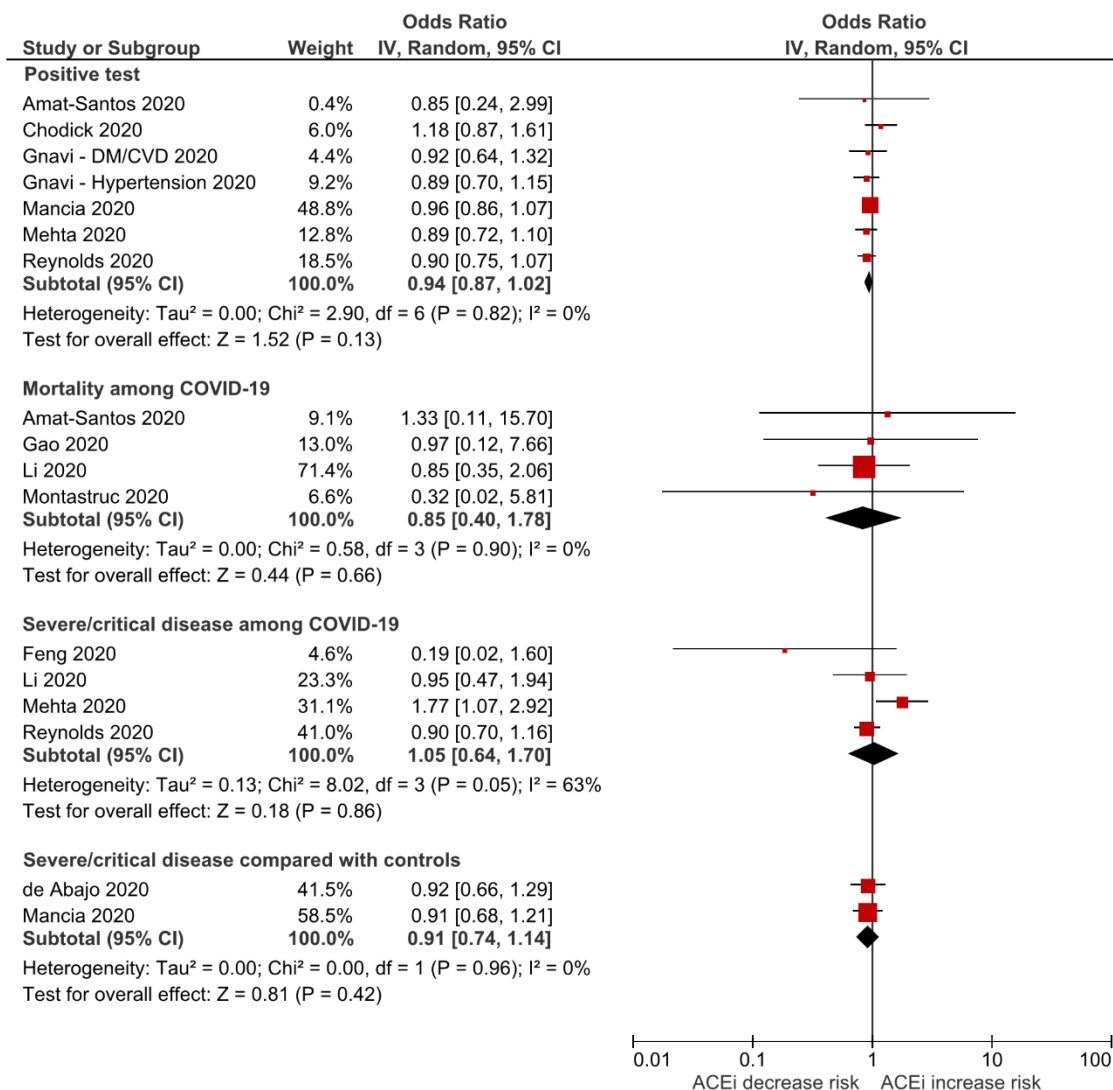

Supplementary Figure 2: Forest plots of ACEi association with the risk of COVID-19 infection and disease severity.



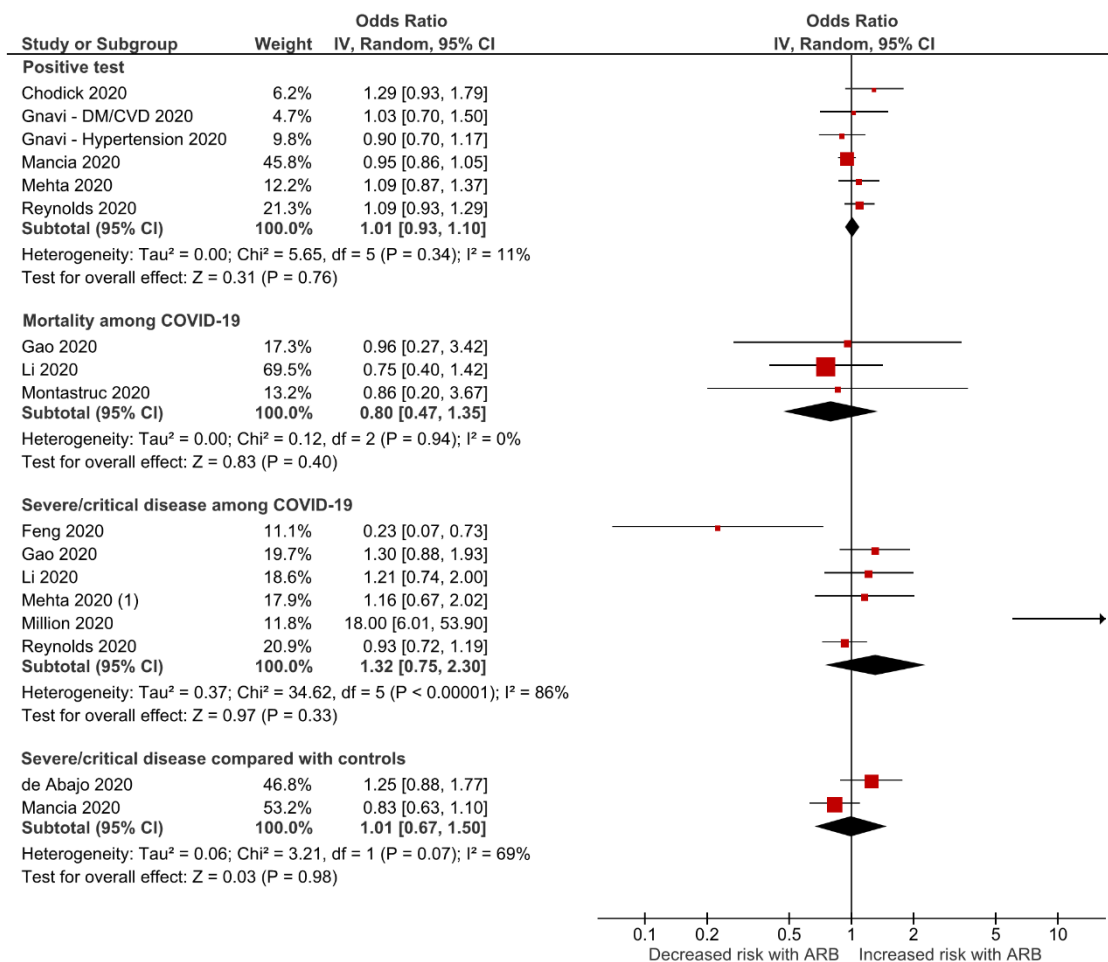

Supplementary Figure 3: Forest plots of ARB association with the risk of COVID-19 infection and disease severity.

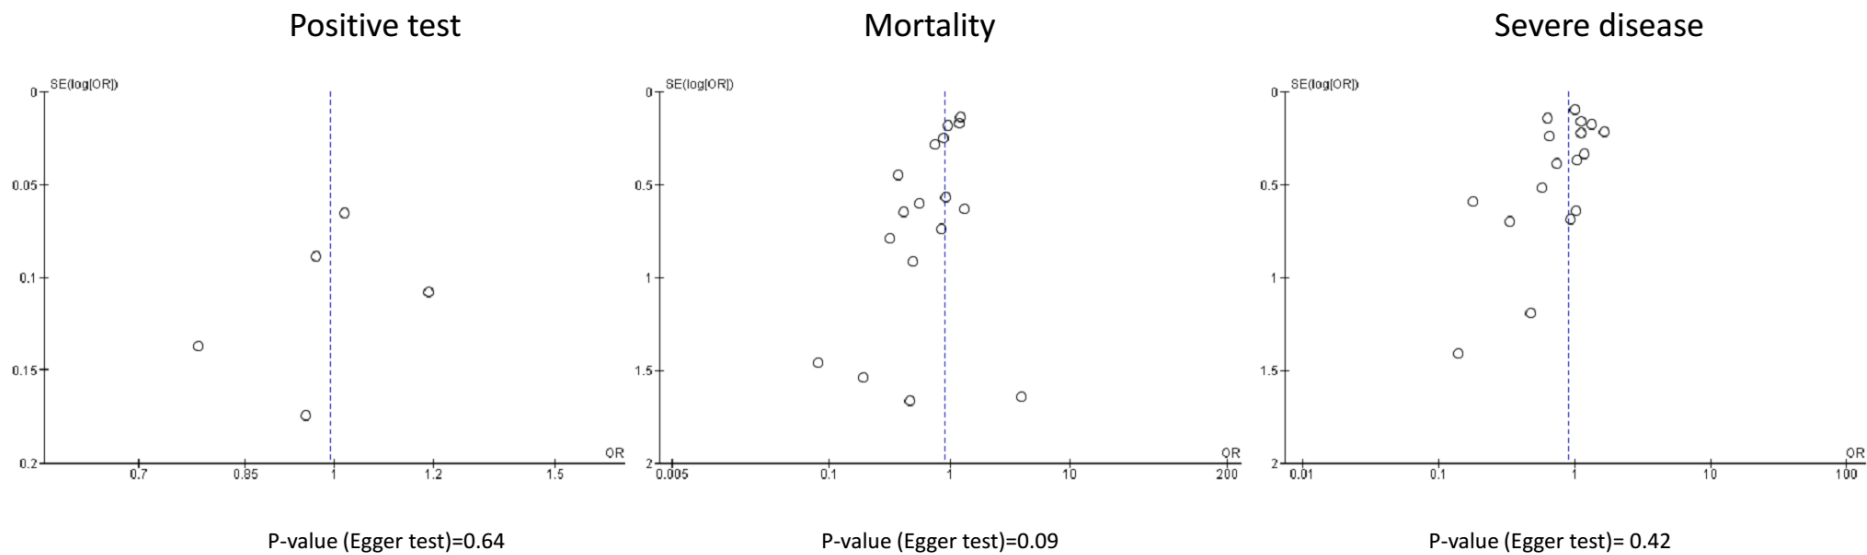

Supplementary Figure 4: Funnel plots for grouped ACEi/ARB evaluations and respective outcomes.

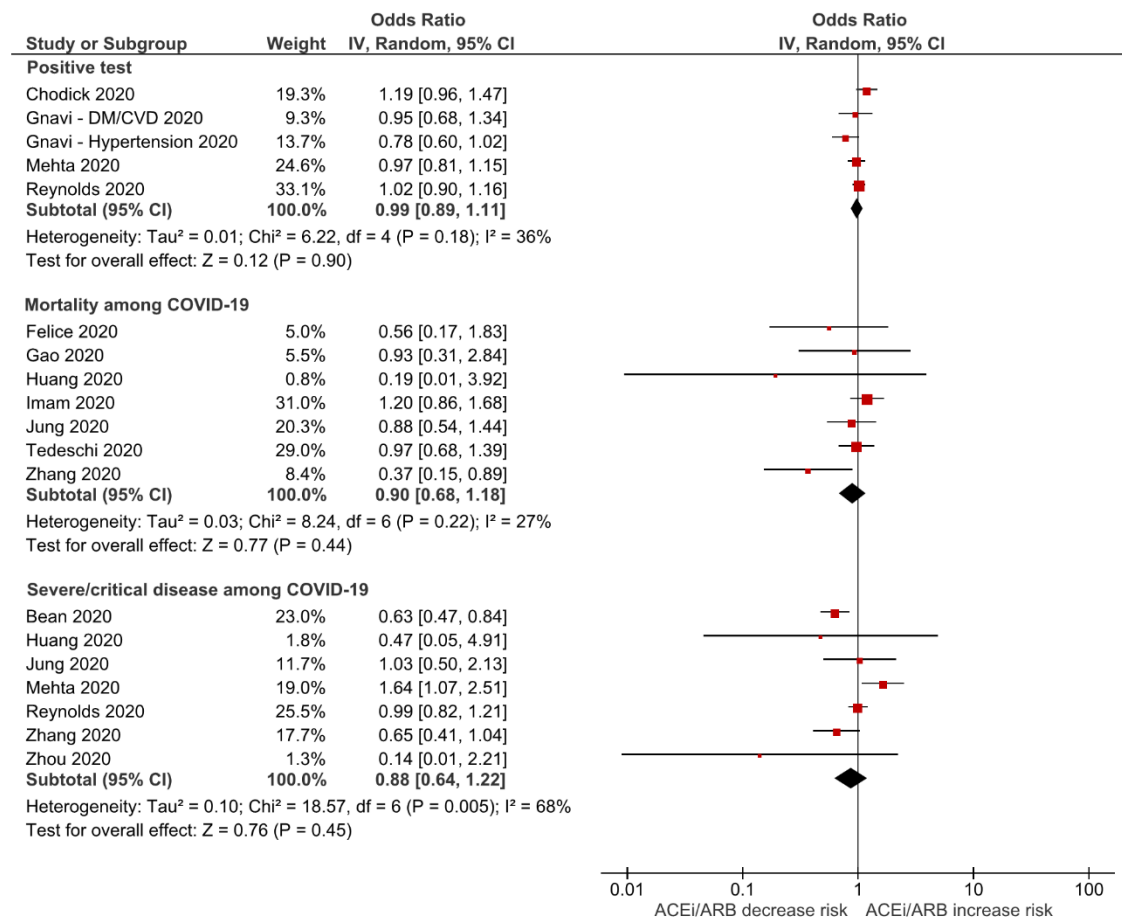

Supplementary Figure 5: Forest plots of ACEi/ARB association in studies with **adjusted estimates** with the risk of COVID-19 infection and disease severity.

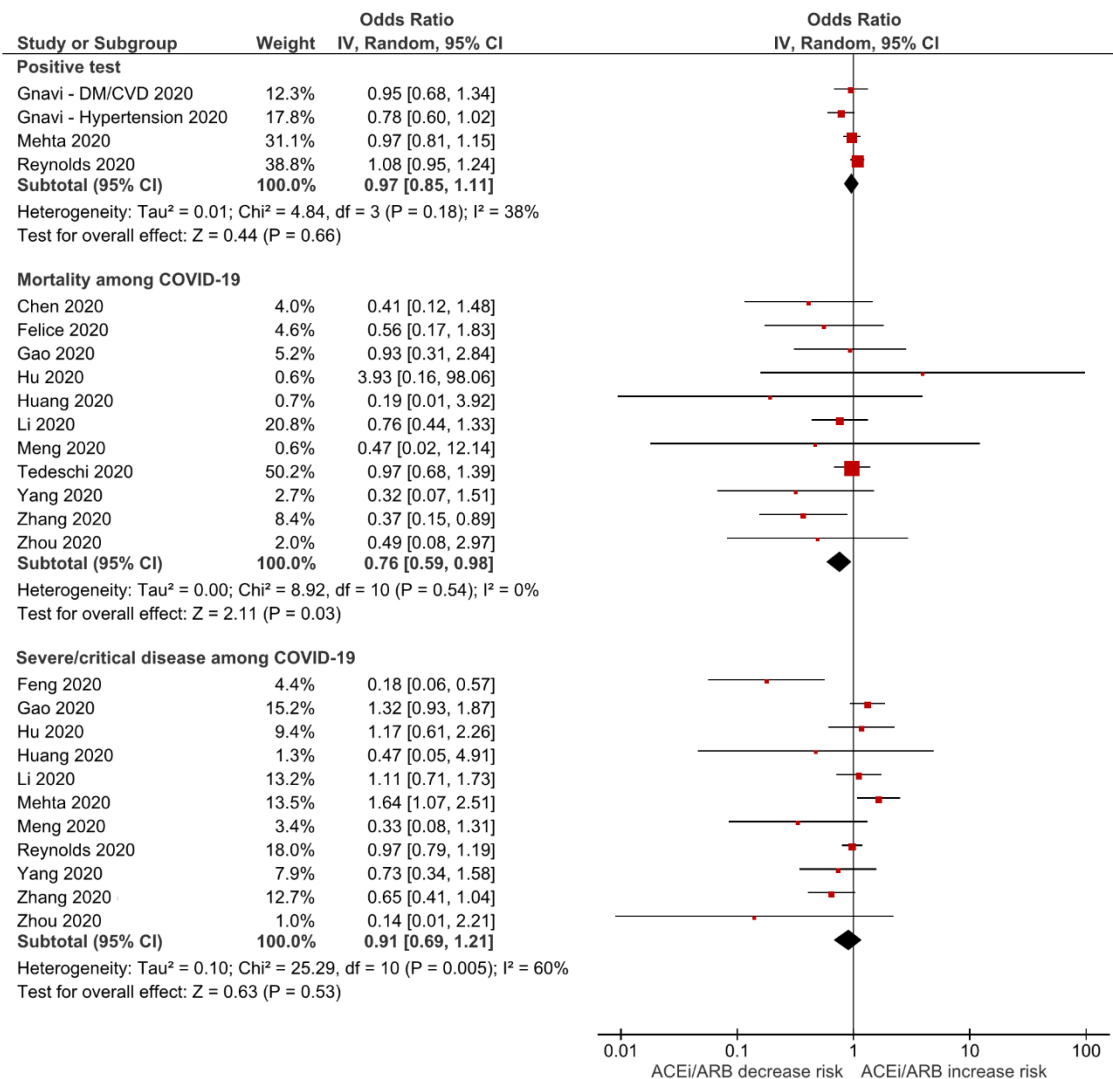

Supplementary Figure 6: Forest plots of ACEi/ARB association with the risk of COVID-19 infection and disease severity, in studies including only patients with **hypertension**.

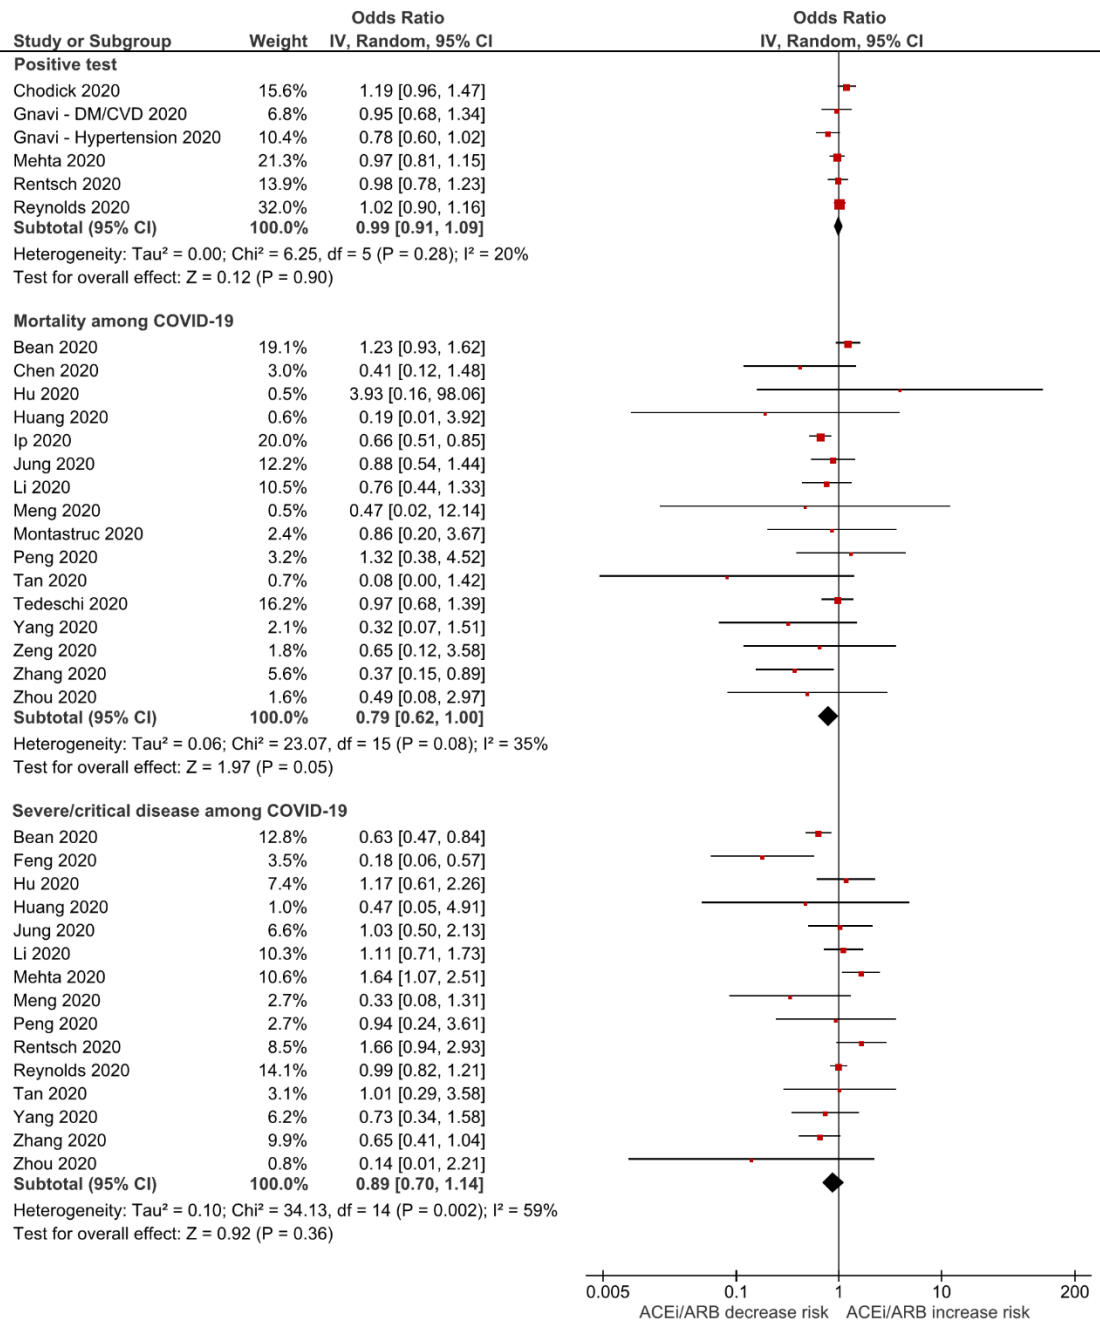

Supplementary Figure 7: Forest plots of ACEi/ARB association with the risk of COVID-19 infection and disease severity, **including unpublished data from medRxiv.**
